## P711

### Carriage of the HLA-DQA1\*05 allele is associated with a high risk of loss of response to adalimumab in patients with Crohn's disease

J. Guardiola Capón<sup>\*1</sup>, K. SERRA<sup>1</sup>, L. Rodríguez-Alonso<sup>1</sup>, E. Santacana<sup>2</sup>, A. Padró<sup>3</sup>, N. Padullés<sup>2</sup>, A. Ruiz-Cerulla<sup>1</sup>, C. Arajol<sup>1</sup>, B. Camps<sup>1</sup>, G. Surís<sup>1</sup>, J. Orobitg<sup>1</sup>, F. Rodríguez-Moranta<sup>1</sup>  
<sup>1</sup>Hospital Universitari de Bellvitge, Gastroenterology, Barcelona, Spain, <sup>2</sup>Hospital Universitari de Bellvitge, Pharmacy, Barcelona, Spain, <sup>3</sup>Hospital Universitari de Bellvitge, Clinical Genetics Laboratory, Barcelona, Spain

**Background:** Loss of response (LOR) to tumour necrosis factor antagonists (anti-TNF) occurs in up to 50% of patients with inflammatory bowel disease (IBD). The ability to predict which patients are likely to lose response would allow therapies to be tailored to the patient's characteristics. Immunogenicity is a common cause of LOR. Recently, a GWAS performed using the PANTS cohort demonstrated that carriage of one or more HLA-DQA1\*05 alleles confers an increased risk of immunogenicity to anti-TNF therapy (Sazonovs et al. Gastroenterology 2019). We found that HLA-DQA1\*05 carriage also identified patients at increased risk of clinical LOR to infliximab (Guardiola et al. ECCO 2019). The aim of our study was to know if carriage of a HLA-DQA1\*05 allele is also associated with secondary LOR to adalimumab (ADA) in patients with Crohn's disease (CD).

**Methods:** This is a retrospective cohort study from a prospectively maintained data base. Patients were included if they had achieved response to ADA. LOR was defined as recurrence or worsening of IBD-related symptoms that required a change or intensification in treatment, hospitalisation or surgery. Independent predictors of LOR were identified using univariate and multivariable Cox proportional hazard regression.

**Results:** We included 53 patients with Crohn's disease, followed up to LOR ( $n = 31$ , 58%) or a median of 51 months (IQR 35–74). Forty-five per cent were carriers of an HLA-DQA1\*05 allele. HLA-DQA1\*05 carriage was associated with LOR both, upon univariate analysis (HR 2.1 (95% CI 1.1–4.3),  $p = 0.04$ ) and upon multivariate analysis, after adjusting for immunomodulators use, smoking status and BMI (HR 2.74 (95% CI 1.2–6.2),  $p = 0.02$ ) (Figure 1). The cumulative persistence rates of ADA after adjusting for immunomodulators use was significantly lower in HLA-DQA1\*05 carriers compared with non-carriers (HR 4 (95% CI 1.2–15.5),  $p = 0.02$ ) (Figure 2).

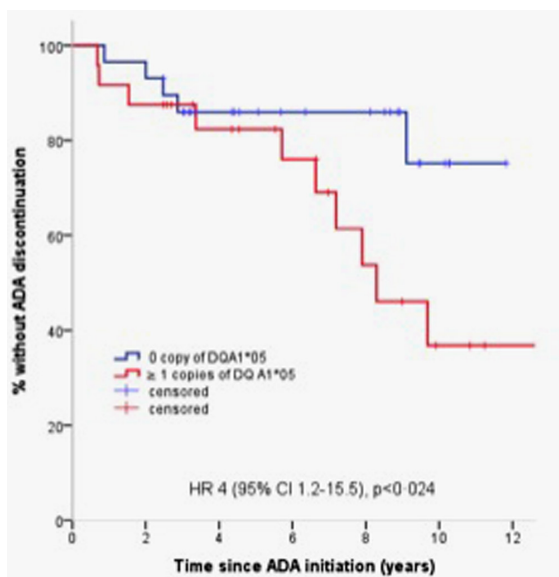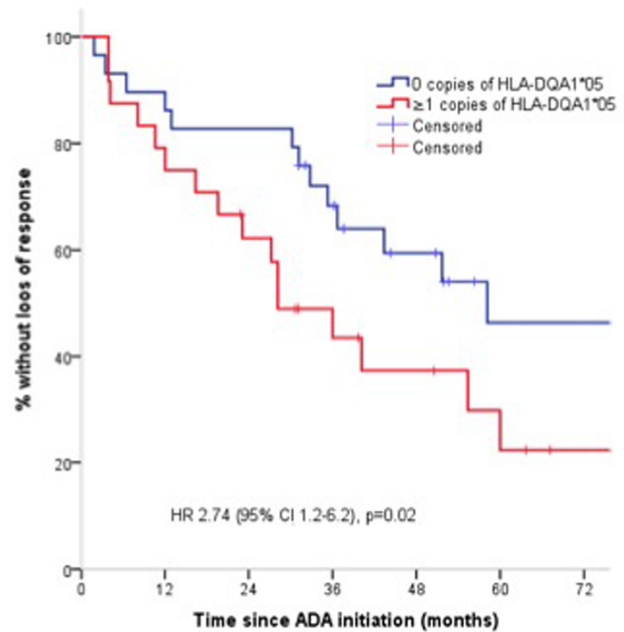

**Conclusion:** HLA-DQA1\*05 carriage is frequent and it is associated with a marked increase in the risk of LOR to ADA. HLA-DQA1\*05 may become a clinically meaningful genetic marker that could allow for treatment to be tailored according to the risk of LOR, which is a step towards personalised medicine.

## P712

### Association of histologic-endoscopic mucosal healing after ustekinumab induction or maintenance therapy with 2-year outcomes in the UNIFI Phase 3 study in ulcerative colitis

K. Li<sup>\*1</sup>, F. Yang<sup>1</sup>, C. Marano<sup>1</sup>, H. Zhang<sup>2</sup>, W.J. Sandborn<sup>3</sup>, B.E. Sands<sup>4</sup>, B.G. Feagan<sup>5</sup>, D.T. Rubin<sup>6</sup>, L. Peyrin-Biroulet<sup>7</sup>, J.R. Friendman<sup>1</sup>, G. De Hertogh<sup>8</sup>

UNIFI Investigators, <sup>1</sup>Janssen Research & Development- LLC, Immunology, Spring House, USA, <sup>2</sup>Janssen Research & Development-LLC, Clinical Biostats, Spring House, USA, <sup>3</sup>University of California San Diego, Gastroenterology, La Jolla, USA, <sup>4</sup>Icahn School of Medicine at Mount Sinai, Gastroenterology, New York, USA, <sup>5</sup>Robarts Research Institute, Robarts Clinical Trials, London, Canada, <sup>6</sup>University of Chicago Medicine, Gastroenterology, Chicago, USA, <sup>7</sup>Nancy University Hospital- Université de Lorraine, Gastroenterology, Nancy, France, <sup>8</sup>University Hospitals KU Leuven, Pathology, Leuven, Belgium

**Background:** Ustekinumab (UST) is an effective therapy for moderate-to-severe ulcerative colitis (UC). Histological and endoscopic improvement of mucosa after induction are associated with clinical remission and steroid-free clinical remission at maintenance Week 44. The association of histological-endoscopic mucosal healing after UST induction or maintenance therapy with 2-year outcomes in moderate-to-severe UC is not known.

**Methods:** In the UNIFI study of UST in moderate-to-severe UC, histological-endoscopic mucosal healing was defined as achieving both endoscopic improvement (Mayo endoscopy subscore  $\leq 1$ ) and histological improvement (i.e., neutrophil infiltration in  $< 5\%$  of crypts, no crypt destruction, and no erosions, ulcerations, or granulation tissue; based on the Geboes score). Associations of mucosal improvement after induction (irrespective of treatment) or UST maintenance with long-term efficacy of UST, disease severity, inflammation level,
